# Supplementary material
Source: HighWire-hosted journal article supplement (https://erj.ersjournals.com/content/57/4/2004055)
Supplement: inline-supplementary-material-1 [file inline-supplementary-material-1.pdf]

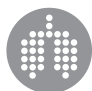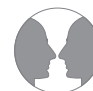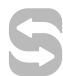

SHAREABLE PDF

# Relationship between supernormal lung function and long-term risk of hospitalisations and mortality: a population-based cohort study

Yunus Çolak <sup>1,2,3</sup>, Børge G. Nordestgaard<sup>1,2,3</sup>, Jørgen Vestbo <sup>4</sup>, Peter Lange<sup>2,3,5,6</sup> and Shoaib Afzal<sup>1,2,3</sup>

**Affiliations:** <sup>1</sup>Dept of Clinical Biochemistry, Herlev and Gentofte Hospital, Copenhagen University Hospital, Herlev, Denmark. <sup>2</sup>The Copenhagen General Population Study, Herlev and Gentofte Hospital, Copenhagen University Hospital, Herlev, Denmark. <sup>3</sup>Faculty of Health and Medical Sciences, University of Copenhagen, Copenhagen, Denmark. <sup>4</sup>Division of Infection, Immunity and Respiratory Medicine, School of Biological Sciences, Manchester Academic Health Science Centre, University of Manchester, and Manchester University NHS Foundation Trust, Manchester, UK. <sup>5</sup>Dept of Public Health, Section of Epidemiology, University of Copenhagen, Copenhagen, Denmark. <sup>6</sup>Dept of Internal Medicine, Section of Respiratory Medicine, Herlev and Gentofte Hospital, Copenhagen University Hospital, Herlev, Denmark.

**Correspondence:** Shoaib Afzal, Dept of Clinical Biochemistry and the Copenhagen General Population Study, Herlev and Gentofte Hospital, Copenhagen University Hospital, Borgmester Ib Juuls Vej 73, Entrance 7, 4. Floor, M3, Herlev, DK-2730, Denmark. E-mail: shoaib.afzal@regionh.dk

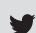

@ERSpublications

**Supernormal lung function is associated with fewer cardiovascular and respiratory events and a survival benefit independent from major risk factors** <https://bit.ly/371l3ut>

**Cite this article as:** Çolak Y, Nordestgaard BG, Vestbo J, *et al.* Relationship between supernormal lung function and long-term risk of hospitalisations and mortality: a population-based cohort study. *Eur Respir J* 2021; 57: 2004055 [<https://doi.org/10.1183/13993003.04055-2020>].

This single-page version can be shared freely online.

## To the Editor:

Cardiovascular and respiratory diseases are major contributors to global deaths [1]. Although low lung function is a risk factor for early death, like hypertension and hypercholesterolaemia [2], evaluation of lung function in primary care is not prioritised as highly as blood pressure or cholesterol measurements [3]. Also, public health authorities have remained silent on major health challenges other than smoking relevant for development and preservation of normal lung function from birth to old age. It is now increasingly evident that low lung function in childhood may affect general health throughout life [4–8]. It therefore seems likely that improvement of lung function on a population-scale may be associated with lower morbidity and mortality. We therefore tested the hypothesis that supernormal lung function is associated with lower morbidity and mortality.
